# Supplementary material
Source: PubMed Central journal article supplement (PMC3133202)
Supplement: supp_193_12_2931__1.pdf [file supp_193_12_2931__1.pdf]

# 1 **Supplementary Material**

## 2 **Methods**

3 **Cloning of *L. monocytogenes* genes.** Genomic DNA was used to amplify by PCR the *nrdA*,  
4 *nrdB*, *nrdI*, *trxL*, genes. Table S3 lists the oligonucleotide primers and restriction endonuclease  
5 used for cloning and expression of genes. DNA products were inserted into the pGEM-T Easy  
6 vector (Promega) and electroporated (BIO-RAD pulse controller plus) into *E. coli* XL1-Blue  
7 cells and transformants isolated on LB plates supplemented with 100 µg/ml of ampicillin, 0.5  
8 mM isopropyl-b-D-thiogalactopyranoside (IPTG) and 80 µg/ml 5-bromo-4-chloro-3-indolyl-  
9 β-D-galactoside (X-Gal) employing standard procedures (10). Positive transformants were  
10 detected using blue-white colony screening and colony PCR. The DNA inserts were  
11 sequenced to confirm their integrity and subsequently introduced either into the appropriate  
12 expression vector (Table 1, main text).

13 **Protein overexpression.** Overnight cultures of *E. coli* BL21(λDE3) carrying the protein  
14 expression constructs were diluted to a 0.1 absorbance at 600nm in LB containing antibiotics  
15 (100 µg/ml of ampicillin for pET14b constructs and 50 µg/ml kanamycin for pET28a(+)  
16 constructs and incubated at 37°C, 250 rpm, until an absorbance of 0.6 at 600 nm was  
17 obtained. IPTG was added to a concentration of 0.1 mM and cells were further incubated for 3  
18 h at 37°C; in the case of the *nrdA* and *nrdB* constructs incubation was at 25°C. Cultures were  
19 harvested by centrifugation at 4,000 x g for 10 min at 4°C. The supernatant was discarded and  
20 the cell pellets stored at -70°C.

21 **Protein purification.** Frozen cells were thawed and suspended in sonication buffer (50 mM  
22 Tris-HCl pH 8.5, 300 mM NaCl, 10 mM imidazole). Phenylmethylsulfonyl fluoride (PMSF)  
23 was added to the cell suspension in a final concentration of 1 mM, and the mixture was  
24 sonicated in an ultrasonic processor (Misonics) until a clear solution was obtained. The  
25 sonicate was centrifuged at 10,000 X g for 45 min at 4°C. The clear supernatant was loaded

1 on a HisTrap<sup>TM</sup> HP Nickel affinity column (GE Healthcare) using the AKTAprime plus  
2 system (GE Healthcare), equilibrated with the sonication buffer. The column was washed  
3 with the buffer and the proteins were eluted using a step gradient of buffer containing 50 mM,  
4 100 mM and 250 mM imidazole. Protein samples were dialyzed against buffer containing 50  
5 mM Tris-HCl pH 8.5, 300 mM NaCl, 5 mM dithiothreitol (DTT) and 20% glycerol. Protein  
6 recovery was monitored using the Bradford assay (2) and by SDS sodium dodecyl sulfate  
7 (SDS) polyacrylamide gel electrophoresis.

8

## 9 **Results**

10 **TrxL is a potential hydrogen donor for the listerial class I RNR.** Studies of class I RNR  
11 enzyme activity were carried out employing NrdA, NrdB, NrdI and TrxL Ni-affinity purified  
12 His<sub>6</sub>-tagged recombinant proteins. RNR activity was assayed by monitoring the conversion of  
13 [<sup>3</sup>H]CDP to [<sup>3</sup>H]dCDP (4). Conversion of CDP to dCDP was dependent on NrdA and NrdB  
14 proteins (Fig. S2 panels A and B) and on a hydrogen donor system (Fig. S2 panel C). Optimal  
15 enzyme rates were obtained in a reaction mixture containing equimolar amounts of NrdA and  
16 NrdB proteins, in 50 µl reaction mixture containing 50 mM Tris-Hcl (pH 7.6), 10mM DTT as  
17 the artificial chemical reductant, 5-10 mM ATP, [<sup>3</sup>H]CDP and 5 mM MgCl<sub>2</sub> and incubated for  
18 20 min at 30°C, (Fig. S2). RNR specific activity under these conditions was 2.03 nmol of  
19 dCDP formed min<sup>-1</sup> mg<sup>-1</sup> protein. The reaction was 90% inhibited by the addition of 10 mM  
20 hydroxyurea (HU) (Fig. S2 panel F), which is a potent inhibitor of the oxygen dependent class  
21 I RNR radical machinery (3, 9). Many class Ia RNRs (but not class Ib RNRs) contain a  
22 segment of ~100 amino acids in the N-terminal portion of the NrdA subunit termed the ATP-  
23 cone domain (1). The ATP-cone domain functions to bind ATP or dATP to allosterically  
24 regulate overall enzyme activity (8). We identified an amino acid sequence present in the N-  
25 terminal portion of the *L. monocytogenes* NrdA (and in other listerial NrdA proteins) with

1 significant similarity to both the PROSITE and InterPro ATP-cone profiles (PS51161 and  
2 IPR005144, respectively). To determine whether the activity of the *L. monocytogenes* class I  
3 RNR is modulated by ATP and dATP, assays were carried out in the presence of 0-15 mM  
4 ATP and 0-10 mM dATP. Maximum activity was obtained with 3 mM ATP (Fig. S2 panel  
5 D), stimulation was about 60 fold above that found in the absence of ATP. In contrast, dATP  
6 alone had no effect on activity. When 1 mM dATP was added to a reaction mixture  
7 containing 5 mM ATP, enzyme activity was inhibited by 90% (Fig. S2 panel E). These results  
8 conform to the typical pattern observed for class Ia RNRs and place the *L. monocytogenes*  
9 aerobic RNR in the class Ia subdivision (5). To assess whether TrxL, the thioredoxin-like  
10 protein encoded in the class Ia RNR operon, can serve as an electron donor for the NrdAB  
11 reaction we performed assays in the presence of 1-2 mM DTT and variable amounts of TrxL  
12 protein. TrxL significantly stimulated RNR activity (Fig. S3). These results support the view  
13 that TrxL, together with thioredoxin reductase and NADPH, may function *in vivo* as a  
14 potential electron donor for the aerobic class I RNR as has been previously described for the  
15 NrdH proteins of *E. coli* and *Staphylococcus aureus* (6, 7).

16

## 17 **References to Methods and Results**

18

- 19 1. **Aravind, L., Y. I. Wolf, and E. V. Koonin.** 2000. The ATP-cone: an evolutionarily  
20 mobile, ATP-binding regulatory domain. *J. Mol. Microbiol. Biotechnol* **2**:191-194.
- 21 2. **Bradford, M. M.** 1976. A rapid and sensitive method for the quantitation of  
22 microgram quantities of protein utilizing the principle of protein-dye binding. *Anal.*  
23 *Biochem.* **72**:248-254.
- 24 3. **Ehrenberg, A., and P. Reichard.** 1972. Electron spin resonance of the iron-  
25 containing protein B2 from ribonucleotide reductase. *J. Biol. Chem.* **247**:3485-3488.

- 1 4. **Engstrom, Y., S. Eriksson, L. Thelander, and M. Akerman.** 1979. Ribonucleotide  
2 reductase from calf thymus. Purification and properties. *Biochemistry* **18**:2941-2948.
- 3 5. **Jordan, A., and P. Reichard.** 1998. Ribonucleotide reductases. *Annu. Rev. Biochem.*  
4 **67**:71-98.
- 5 6. **Masalha, M., I. Borovok, R. Schreiber, Y. Aharonowitz, and G. Cohen.** 2001.  
6 Analysis of transcription of the *Staphylococcus aureus* aerobic class Ib and anaerobic  
7 class III ribonucleotide reductase genes in response to oxygen. *J. Bacteriol.* **183**:7260-  
8 7272.
- 9 7. **Rabinovitch, I., M. Yanku, A. Yeheskel, G. Cohen, I. Borovok, and Y.**  
10 **Aharonowitz.** 2010. *Staphylococcus aureus* NrdH redoxin is a reductant of the class  
11 Ib ribonucleotide reductase. *J. Bacteriol.* **192**:4963-4972.
- 12 8. **Reichard, P.** 2002. Ribonucleotide reductases: the evolution of allosteric regulation.  
13 *Arch Biochem. Biophys.* **397**:149-155.
- 14 9. **Reichard, P., and A. Ehrenberg.** 1983. Ribonucleotide reductase--a radical enzyme.  
15 *Science* **221**:514-519.
- 16 10. **Sambrook, J., Fritsch, E. F., T. Maniatis.** 1989. *Molecular Cloning: a laboratory*  
17 *manual*, vol. Cold Spring Harbor, NY.

## 19 **Legends to Figures**

20

21 **Figure S1. The *L. monocytogenes* EGD-e class I RNR *nrdABI-trxL* gene cluster form an**  
22 **operon.** Co-transcription of the *nrdA-nrdB*, *nrdB-nrdI*, *nrdI-trxL* and *trxL-mazG* genes was  
23 tested under aerobic and anaerobic growth conditions. The *rpoD* gene, which encodes a RNA  
24 polymerase sigma subunit, served as a positive control. Transcription of the *mazG* gene was  
25 assayed separately (data not shown). For each gene/gene pair three RT reactions were

1 performed, with reverse transcriptase (RT) (+), without RT (-), and a genomic DNA control  
2 (C). Standard PCR reactions were run employing the primers shown in Table S1.  
3 Oligonucleotide primers used in RT-PCR to demonstrate co-transcription of genes, and in 5'-  
4 RACE experiments to determine *nrdA* and *nrdD* transcription start sites, are shown in Table  
5 S1. The *nrdABI-trxL* genes are transcribed as a single operon under both aerobic and  
6 anaerobic conditions. Although a Rho-dependent termination site is present down-stream of  
7 the *trxL* gene, the *mazG* gene was also found to be co-transcribed with the class I RNR  
8 operon in agreement with Northern blot analysis that revealed a transcript corresponding in  
9 size to that for the *nrdA-mazG* genes (data not shown).

10

11 **Figure S2. ATP and dATP regulate the activity of the *L. monocytogenes* EGD-e class I**  
12 **RNR.** RNR activity was assayed by monitoring the conversion of [<sup>3</sup>H]CDP to [<sup>3</sup>H]dCDP (see  
13 above). Panels: A. Constant NrdB concentration (23μg per 50 μl reaction mixture) with  
14 increasing NrdA concentration; B. Constant NrdA concentration (48μg per 50 μl reaction  
15 mixture) with increasing NrdB concentration; C. Increasing DTT concentrations; D.  
16 Increasing ATP concentration; E. Increasing dATP concentration in the presence of the  
17 optimal ATP concentration; F. Effect of hydroxyurea on activity.

18

19 **Figure S3. TrxL stimulates the *L. monocytogenes* EGD-e class I NrdAB RNR activity.**  
20 Reactions were carried out with NrdA (36 μg) and NrdB (24 μg) incubated in the standard  
21 assay mixture (see above) plus 0-10 mM DTT. TrxL (24 μg) was added with 2 mM DTT.

22

23 **Figure S4. Molecular phylogeny of bacterial class I RNR NrdA and NrdE proteins.** The  
24 neighbor-joining (NJ) method was applied to estimate relationships among aligned sequences  
25 by using the MEGA 4 program. *Archaeoglobus fulgidus* DSM 4304 class II RNR NrdJ amino

1 acid sequence (accession number AAB89584) was used as the outgroup in the tree. Bootstrap  
2 analysis using NJ was conducted with 500 replicates, and values above 50% are given at  
3 nodes. Bacterial names and accession numbers of NrdA and NrdE proteins are listed in Table  
4 S5.

5

6

7

8

9

10

11

12

13

14

15

16

17

18

19

20

21

22

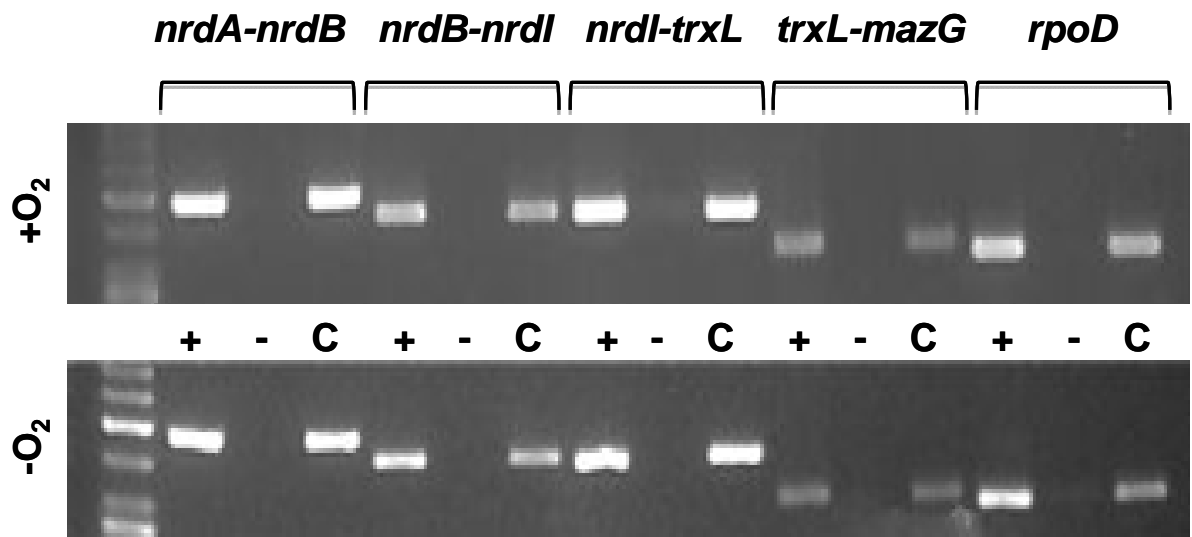

Figure S1

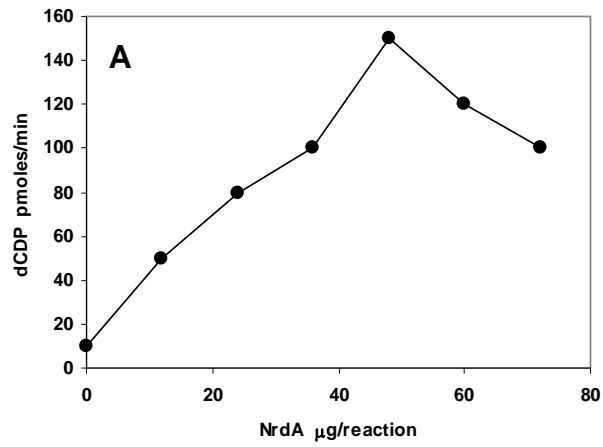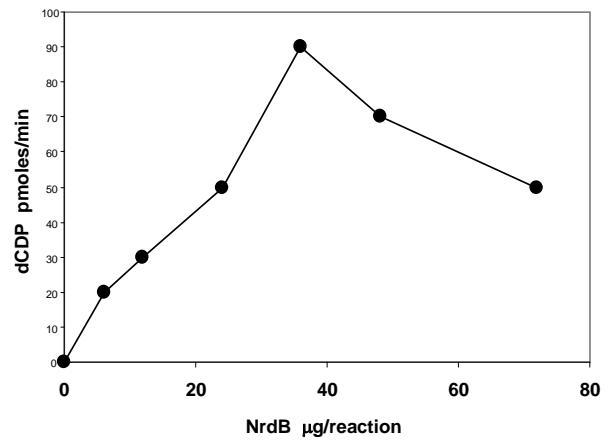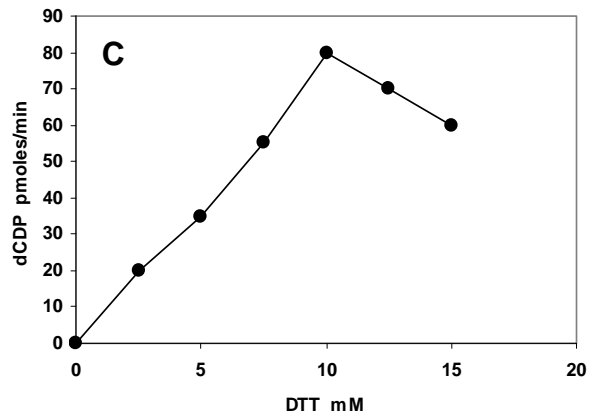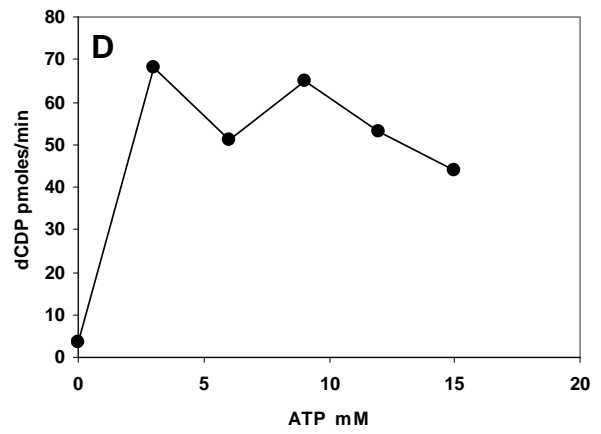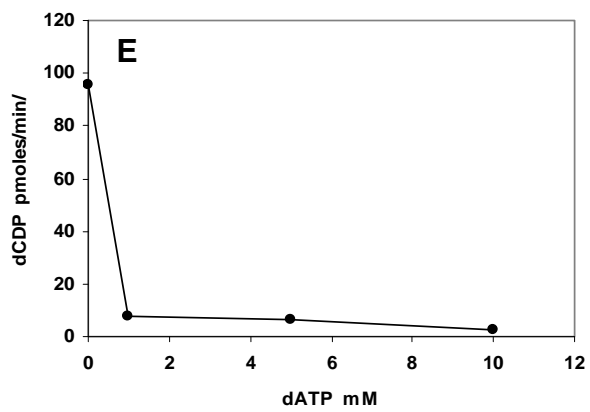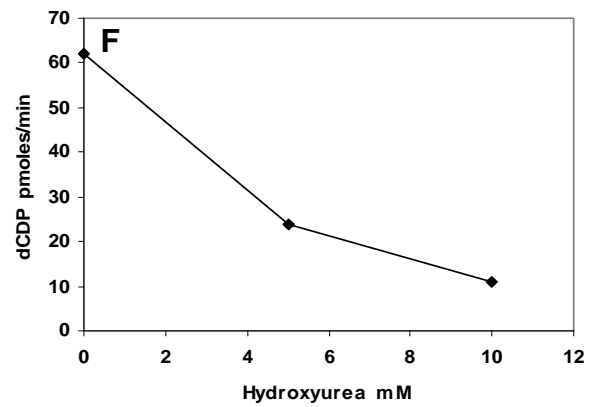

Figure S2



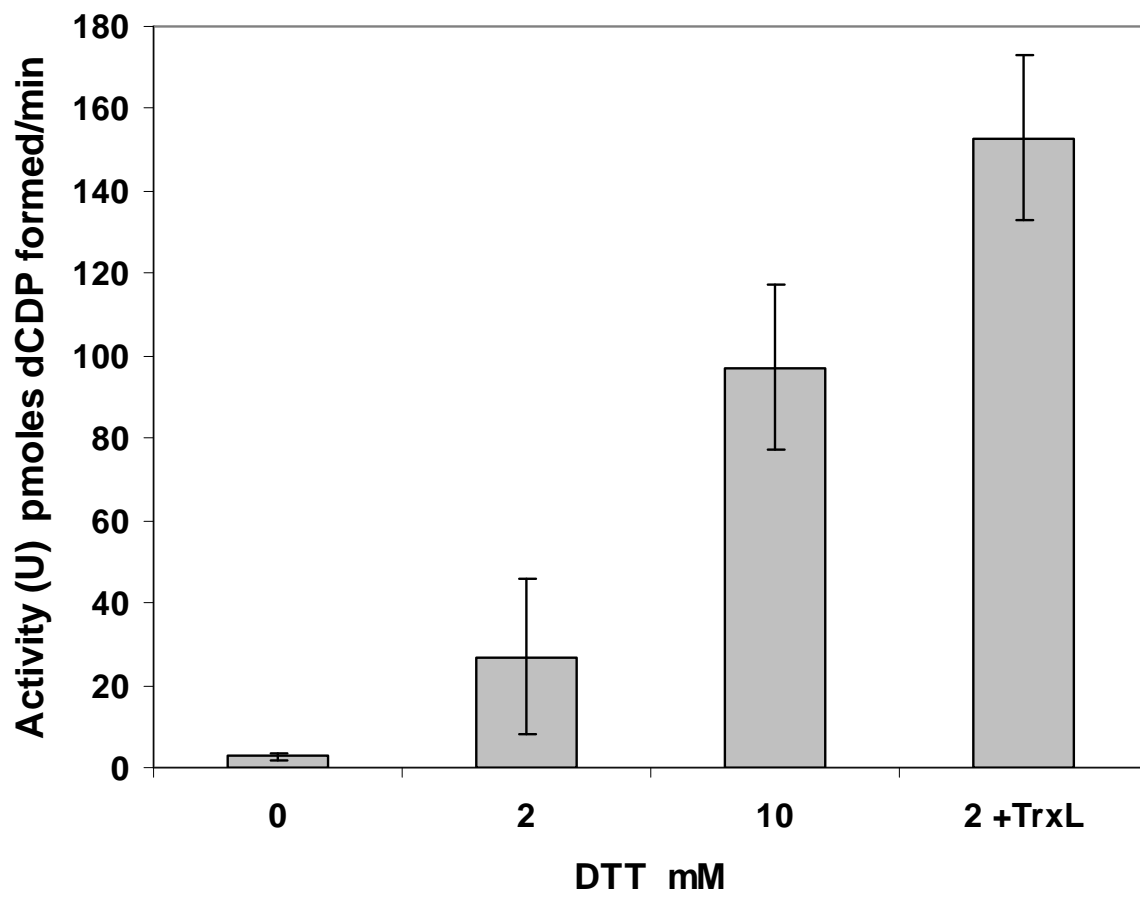

Figure S3

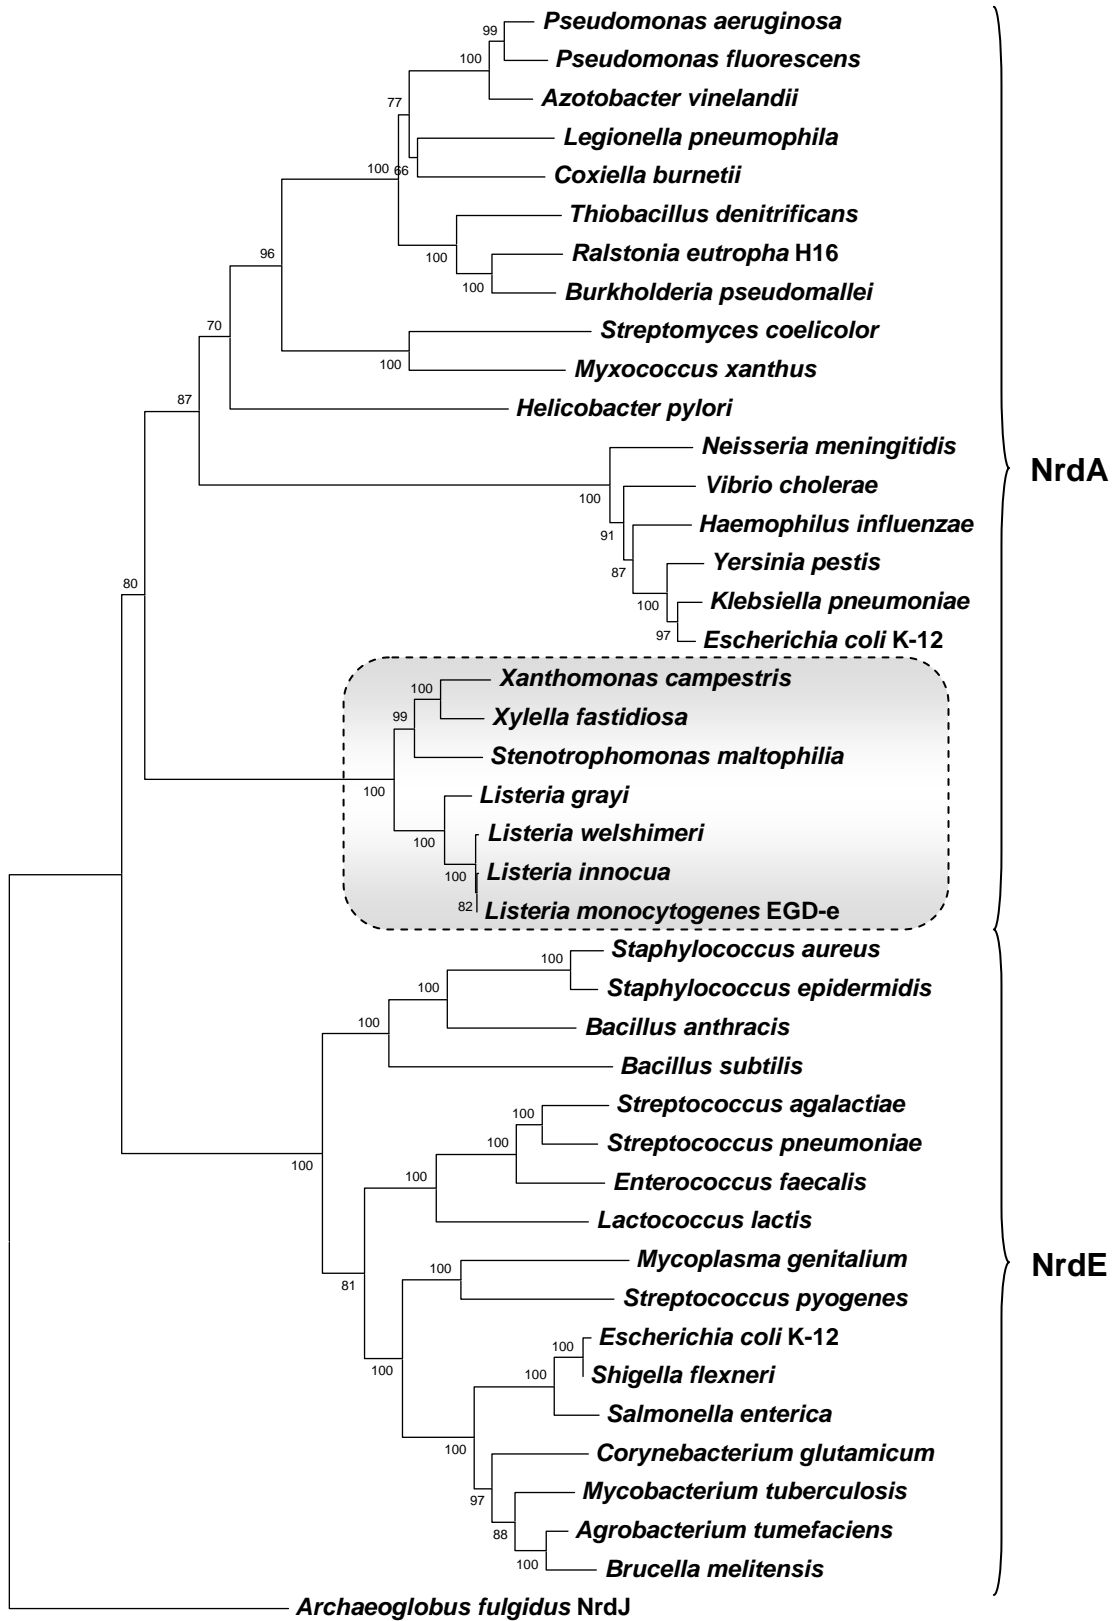

Figure S4

1  
2  
3  
4  
5  
6  
7  
8  
9

**Tables**

**Table S1. Oligonucleotide primers used in RT-PCR and 5'-RACE experiments.**

| <b>Primer name</b>      | <b>Primer sequence (5'→3')</b> | <b>Comments</b> |
|-------------------------|--------------------------------|-----------------|
| <b>RT-PCR primers</b>   |                                |                 |
| <b>nrdA1F</b>           | CGCGTTACTTAGCGACTGAC           |                 |
| <b>nrdA1R</b>           | ACGGATAGCAGCTCCTGTTG           |                 |
| <b>nrdA2F</b>           | GTGCCAAGTGGTATCAAAGC           |                 |
| <b>nrdB1F</b>           | AGCCTATGCAGATAACTTTACAG        |                 |
| <b>nrdB1R</b>           | TGTTTGCGGAGAATCCAGTG           |                 |
| <b>nrdB2F</b>           | CCCGTATCCTTCTTTCTACCG          |                 |
| <b>nrdB2R</b>           | GCGTCCATGATTGGCTCATTAC         |                 |
| <b>nrdI1F</b>           | AGCGAAGGGCATGAAGTTG            |                 |
| <b>nrdI1R</b>           | TTTGCCATTCCGGTCGACAG           |                 |
| <b>nrdI2F</b>           | TTGCGGAGCTGTCGACCGAATG         |                 |
| <b>nrdI2R</b>           | TTTGCCATTCCGGTCGACAG           |                 |
| <b>trx1R</b>            | GTGGATCTCTTCGCCGCCTTTG         |                 |
| <b>trx1F</b>            | TTTACAAAGGCGGCGAAGAG           |                 |
| <b>trx2F</b>            | GCGCTAAGGAGTGAATCAAATGAC       |                 |
| <b>trx2R</b>            | GGATCTCTTCGCCGCCTTTG           |                 |
| <b>mazG1F</b>           | AGAGCGTGATTGGCTAGATC           |                 |
| <b>mazG1R</b>           | TCTGCTGCTTCAAGTGAC             |                 |
| <b>mazG2R</b>           | TTTGGCCAAGTTCTCCTACG           |                 |
| <b>rpoD1F</b>           | CTGCCAGATTAGCTCCATTC           |                 |
| <b>rpoD1R</b>           | TTCAATGTCGCCAGCTTC             |                 |
| <b>5'-RACE primers</b>  |                                |                 |
| <b>nrdA_5RACE_FOR1</b>  | GAACGACCACAAATAGTTC            |                 |
| <b>nrdA_5RACE_REV1</b>  | ATATCTGTACGAGCTTCTG            |                 |
| <b>nrdA_5RACE_REV2</b>  | CCGCGTAATCTTCCTTCTTCTC         |                 |
| <b>nrdA_5RACE_REV3</b>  | TCCGGCTTTTGTCAAAGGTAG          |                 |
| <b>nrdD_5RACE_FOR</b>   | TTCGTAATGCCGTTGAAGC            |                 |
| <b>nrdD_5RACE_REV1</b>  | CAGTCGCGTCTTTGTTGG             |                 |
| <b>nrdD_5RACE_REV2</b>  | GCGGTACTCTATGTAAGCC            |                 |
| <b>nrdD_5RACE_REV3a</b> | TCTGCCTTGTTAGGTAATTCAC         |                 |

1  
2  
3  
4  
5  
6  
7  
8  
9  
10  
11

**Table S2. *Listeria monocytogenes* genomes analyzed in this study.**

| serovar | strain <sup>1</sup>      | NrdD <sup>2</sup> | genome accession number and status <sup>3</sup> |
|---------|--------------------------|-------------------|-------------------------------------------------|
| 1/2a    | EGD-e (ATCC BAA-679)     | 6-aa deletion     | NC_003210; complete                             |
|         | SLCC 5764 (“Mackanness”) | WT                | this study                                      |
|         | 08-5578                  | WT                | NC_013766; complete                             |
|         | 08-5923                  | WT                | NC_013768; complete                             |
|         | 10403S (DP-L184)         | WT                | AARZ02000008; incomplete                        |
|         | F6854                    | WT                | AADQ01000021; incomplete                        |
|         | F6900                    | WT                | AARU02000005; incomplete                        |
|         | FSL J2-003               | WT                | AARM02000013; incomplete                        |
|         | FSL N3-165               | WT                | AARQ02000010; incomplete                        |
|         | J0161 (FSL R2-499)       | WT                | AARW02000006; incomplete                        |
|         | J2818                    | WT                | AARX02000005; incomplete                        |
| 1/2b    | FSL J1-194               | WT                | AARJ02000007; incomplete                        |
|         | FSL J1-175               | WT                | AARK02000110; incomplete                        |
|         | FSL R2-503 (G6054)       | WT                | AARR02000009; incomplete                        |
| 1/2c    | FSL R2-561               | WT                | AARS01000004; incomplete                        |
| 3a      | Finland 1988             | WT                | AART01000004; incomplete                        |
| 4a      | HCC23                    | WT                | NC_011660; complete                             |
|         | L99                      | WT                | FM211688; complete                              |
|         | FSL F2-208               | WT                | ADXE01000424; incomplete                        |
| 4b      | Clip81459 (CLIP 80459)   | WT                | NC_012488; complete                             |
|         | F2365                    | WT                | NC_002973; complete                             |
|         | FSL N1-017               | WT                | AARP04000007; incomplete                        |
|         | H7858                    | WT                | AADR01000001; incomplete                        |
|         | HPB2262 (Aureli 1997)    | WT                | AATL02000009; incomplete                        |
| 4c      | FSL J2-071               | WT                | AARN04000005; incomplete                        |
|         |                          |                   |                                                 |

<sup>1</sup> strain L99 is reported as serovar 4a in the submission but is reported as serovar 4c in the literature (see for example Moorhead and Dykes. 2003. Curr Microbiol).

<sup>2</sup> “WT” encodes an intact NrdD; “6-aa deletion” refers to the NrdD KITPFE deletion described in this study (see text).

<sup>3</sup> accession numbers and genome status are provided according to GenBank data.

1 **Table S3. Oligonucleotide primers used for construction of recombinant protein**  
 2 **overexpression plasmids.**

3

| <b>RT-PCR primers</b>  |                                              |               |
|------------------------|----------------------------------------------|---------------|
| <b>Primer name</b>     | <b>Primer sequence (5'→3')</b>               | <b>Notes*</b> |
| LMO_nrdA_NdeI_FOR1     | CAGT <u>CATATG</u> AAATGGGGATTGCAAATG        | NdeI          |
| LMO_nrdA_Bpu1102I_REV1 | ATGCTCAGCTT <u>GAGCACC</u> ATTTCG            | Bpu1102I      |
| LMO_nrdB_XhoI_FOR1     | ACGCTCGAGATGGCTA <u>ACCAAAA</u> AAG          | XhoI          |
| LMO_nrdB_Bpu1102I_REV1 | GCGCGCTCAGCTCATAAATCGTCG                     | Bpu1102I      |
| LMO_nrdI_NdeI_FOR1     | GCGC <u>CATATG</u> AAGAATCTTGTTAGCC          | NdeI          |
| LMO_nrdI_Bpu1102I_REV1 | GCGGCTCAGCTC <u>ATTTG</u> ATTCCAC            | Bpu1102I      |
| LMO_trxL_NdeI_FOR2     | GCACGGT <u>CATATG</u> ACAAGTATTGAAATTAATCACC | NdeI          |
| LMO_trxL_Bpu1102I_REV2 | ATAGCTCAGCTTACGCGTTTAATGAAACTGC              | Bpu1102I      |

4

5 \* Names of restriction enzymes whose recognition sites are underlined in sequences of  
 6 corresponding primers.

7

8

9

10

11

12

13

14

15

16

17

18

19

20

21

1 Table S4. Oligonucleotide primers used for construction of deletion and insertion *nrdD*  
 2 mutants in *L. monocytogenes* strains.  
 3

| Primer name                                                                                                           | Primer sequence (5'→3')*                                        | Comments                                                                                                                    |
|-----------------------------------------------------------------------------------------------------------------------|-----------------------------------------------------------------|-----------------------------------------------------------------------------------------------------------------------------|
| <b><i>ΔnrdDG</i> in <i>L. monocytogenes</i> strain EGD-e</b>                                                          |                                                                 |                                                                                                                             |
| LMOnrdD_A_SacI                                                                                                        | ATTAGAGCTCAGGGCTTACATAGAGTACC                                   |                                                                                                                             |
| LMOnrdD_B                                                                                                             | <b>CTTTGTCGCCTTCCCATTC</b> ACCGCCGTAAAA<br>TACAGTTGC            | Complimentary<br>nucleotides are shown<br>in bold                                                                           |
| LMOnrdG_C                                                                                                             | <b>GAATGGGAAGGCGACAAAG</b> TGGACAGGCTAC<br>ACTTGG               |                                                                                                                             |
| LMOnrdG_D_XbaI                                                                                                        | TAATTCTAGAGGCTGCTAATAATGGATGC                                   |                                                                                                                             |
| nrdDG_ADflank_FOR                                                                                                     | GGACAAAGAGCGATTCTG                                              |                                                                                                                             |
| nrdDG_ADflank_REV                                                                                                     | CAATACGCACCCAATAGC                                              |                                                                                                                             |
| <b>18 nucleotides deletion encoding KITPFE amino acids in <i>nrdD</i> of <i>L. monocytogenes</i> strain F2365</b>     |                                                                 |                                                                                                                             |
| 4bF2365_nrdD_A_SacI                                                                                                   | ATTAGAGCTCGCCCGAAATCTATCCAAACTG<br>C                            |                                                                                                                             |
| 4bF2365_nrdD_B                                                                                                        | <b>TTTACGAACATCATAGTGAAAGAG</b>                                 | Complimentary<br>nucleotides are shown<br>in bold                                                                           |
| 4bF2365_nrdD_C                                                                                                        | <b>CTCTTTCCACTATGATGTTTCGTAAAAAAATT</b><br>GATTTTGAAAAAGATTATCC |                                                                                                                             |
| 4bF2365_nrdD_D_XbaI                                                                                                   | TAATTCTAGACTAGTACTATCGCTGCTTATA<br>GCAATC                       | Identical in both F2365<br>and EGD-e genomes<br>Primers that were used<br>to confirm EGD-e and<br>F2365 <i>nrdD</i> mutants |
| nrdD_EGDeCOMPfknF                                                                                                     | GGAGCATTGGCAAACGACTAC                                           |                                                                                                                             |
| nrdD_EGDeCOMPfknR                                                                                                     | CCACAGCTTGGGCATTAAAGCCTTC                                       |                                                                                                                             |
| <b>Insertion of 18 nucleotides encoding KITPFE amino acids in <i>nrdD</i> of <i>L. monocytogenes</i> strain EGD-e</b> |                                                                 |                                                                                                                             |
| EGDe_nrdD_A_SacI                                                                                                      | ATTAGAGCTCAGCCCATACCATGCAATGACC                                 |                                                                                                                             |
| EGDe_nrdD_B                                                                                                           | CAATTTTTTCAAATGGGGTAATTTTTTTTACG<br>AACATCATAGTGAAAGAG          | Complimentary<br>nucleotides are shown<br>in bold                                                                           |
| EGDe_nrdD_C                                                                                                           | GTAATAAAATTACCCCATTTGAAAAAATTGA<br>TTTTGAAAAAGATTATCC           |                                                                                                                             |
| EGDe_nrdD_D_XbaI                                                                                                      | TAATTCTAGACTAGTACTATCGCTGCTTATA<br>GCAATC                       |                                                                                                                             |
| <b>pKSV7 multiple cloning site flanking primers</b>                                                                   |                                                                 |                                                                                                                             |
| pKSV7_MCSflank_FOR                                                                                                    | TTCACGTGTTTCGCTCATGG                                            |                                                                                                                             |
| pKSV7_MCSflank_REV                                                                                                    | GCGGGCCTCTTCGCTATTAC                                            |                                                                                                                             |

4

5 \* Nucleotides of restriction sites are underlined.

6

7

8

9

1 **Table S5. Bacterial names and accession numbers of corresponding NrdD, NrdA and**  
2 **NrdE proteins that were used for phylogeny analyses (Figure 6, main text [NrdD];**  
3 **Figure S4, Supplementary Material [NrdA and NrdE]).**  
4

| Organism name                                                | NrdD accession number | NrdA accession number | NrdE accession number |
|--------------------------------------------------------------|-----------------------|-----------------------|-----------------------|
| Enterobacteria phage T4                                      | AAD42633              |                       |                       |
| <i>Actinobacillus succinogenes</i> 130Z                      | ABR74766              |                       |                       |
| <i>Agrobacterium tumefaciens</i> C58                         |                       |                       | AAK85889              |
| <i>Azotobacter vinelandii</i> DJ                             |                       | ACO79483*             |                       |
| <i>Bacillus anthracis</i> Ames                               |                       |                       | AAP25314              |
| <i>Bacillus subtilis</i> 168                                 |                       |                       | CAA92810              |
| <i>Brucella melitensis</i> biovar Abortus 2308               |                       |                       | CAJ13055              |
| <i>Burkholderia pseudomallei</i> 1106a                       |                       | ABN91742              |                       |
| <i>Chromobacterium violaceum</i> ATCC 12472                  | AAQ60084              |                       |                       |
| <i>Citrobacter koseri</i> ATCC BAA-895                       | ABV14659              |                       |                       |
| <i>Corynebacterium glutamicum</i> ATCC 13032                 |                       |                       | CAF21192              |
| <i>Coxiella burnetii</i> RSA 331                             |                       | ABX79118              |                       |
| <i>Enterococcus faecalis</i> V583                            | AAO82452              |                       | AAO80326              |
| <i>Escherichia coli</i> K12 MG1655                           | AAC77195              | AAC75294              | AAC75722              |
| <i>Haemophilus influenzae</i> Rd KW20                        |                       | AAC23305              |                       |
| <i>Helicobacter pylori</i> J99                               |                       | AAD06201              |                       |
| <i>Klebsiella pneumoniae</i> 342                             | ACI10318              | ACI07284              |                       |
| <i>Lactobacillus casei</i> ATCC 334                          | ABJ68995              |                       |                       |
| <i>Lactococcus lactis</i> II1403                             | AAK04371              |                       | AAK05073              |
| <i>Legionella pneumophila</i> str. Paris                     |                       | CAH12890              |                       |
| <i>Listeria grayi</i> DSM 20601                              | EFI83996              | EFI82948              |                       |
| <i>Listeria innocua</i> Clip11262                            | CAC95538              | CAC97487              |                       |
| <i>Listeria monocytogenes</i> 4b F2365                       | AAT03086              |                       |                       |
| <i>Listeria monocytogenes</i> EGD-e                          | CAD00806              | CAD00233              |                       |
| <i>Listeria welshimeri</i> SLCC5334                          | CAK19671              | CAK21590              |                       |
| <i>Mannheimia succiniciproducens</i> MBEL55E                 | AAU37240              |                       |                       |
| <i>Mycobacterium tuberculosis</i> H37Rv                      |                       |                       | CAA16136              |
| <i>Mycoplasma genitalium</i> G37                             |                       |                       | AAC71452              |
| <i>Myxococcus xanthus</i> DK 1622                            |                       | ABF86509              |                       |
| <i>Neisseria meningitidis</i> MC58                           |                       | AAF41667              |                       |
| <i>Pasteurella multocida</i> Pm70                            | AAK03024              |                       |                       |
| <i>Photobacterium profundum</i> SS9                          | CAG22315              |                       |                       |
| <i>Photorhabdus luminescens</i> subsp. <i>laumondii</i> TTO1 | CAE16871              |                       |                       |
| <i>Pseudomonas aeruginosa</i> PAO1                           |                       | AAG04545              |                       |
| <i>Pseudomonas fluorescens</i> Pf0-1                         |                       | ABA75983              |                       |
| <i>Psychromonas ingrahamii</i> 37                            | ABM02592              |                       |                       |
| <i>Pyrococcus furiosus</i> DSM 3638                          | AAL82095              |                       |                       |
| <i>Ralstonia eutropha</i> H16                                |                       | CAJ94310              |                       |

|                                                     |          |          |          |
|-----------------------------------------------------|----------|----------|----------|
| <i>Salmonella enterica</i> serovar Typhi            |          |          | CAD05918 |
| <i>Serratia proteamaculans</i> 568                  | ABV39633 |          |          |
| <i>Shewanella baltica</i> OS155                     | ABN61177 |          |          |
| <i>Shigella dysenteriae</i> Sd197                   | ABB64158 |          |          |
| <i>Shigella flexneri</i> 2a str. 301                |          |          | AAN44196 |
| <i>Staphylococcus aureus</i> COL                    | AAW38633 |          | AAW37848 |
| <i>Staphylococcus epidermidis</i> ATCC 12228        | AAO05814 |          | AAO04110 |
| <i>Stenotrophomonas maltophilia</i> K279a           |          | CAQ46303 |          |
| <i>Streptococcus agalactiae</i> 2603V/R             | AAN00945 |          | AAM99706 |
| <i>Streptococcus gordonii</i> Challis substr. CH1   | ABV10652 |          |          |
| <i>Streptococcus mutans</i> UA159                   | AAN59670 |          |          |
| <i>Streptococcus pneumoniae</i> R6                  |          |          | AAK99869 |
| <i>Streptococcus pyogenes</i> M1 GAS                |          |          | AAK33449 |
| <i>Streptococcus suis</i> 98HAH33                   | ABP93282 |          |          |
| <i>Streptococcus thermophilus</i> LMG 18311         | AAV61557 |          |          |
| <i>Streptomyces coelicolor</i> A3(2)                |          | CAB82485 |          |
| <i>Thiobacillus denitrificans</i> ATCC 25259        |          | AAZ97929 |          |
| <i>Vibrio cholerae</i> O1 biovar El Tor str. N16961 |          | AAF94415 |          |
| <i>Vibrio fischeri</i> ES114                        | AAW87351 |          |          |
| <i>Xanthomonas campestris</i> ATCC 33913            |          | AAM43207 |          |
| <i>Xylella fastidiosa</i> 9a5c                      |          | AAF84006 |          |
| <i>Yersinia pestis</i> KIM 10                       | AAM84321 | AAM86525 |          |

1  
2  
3  
4

\* The original deduced amino acid sequence contains an intein that was removed from the sequence before using in alignments.
